# Supplementary material for: Identifying metabolites by integrating metabolome databases with mass spectrometry cheminformatics
Source: Springer Nature journal article supplement (doi:10.1038/nmeth.4512), 2017-11-27

LECO GC-TOFMS

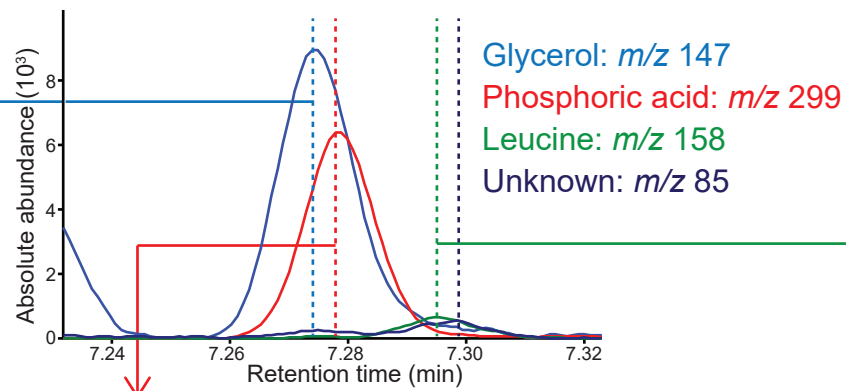

Raw spectrum at 7.274 min

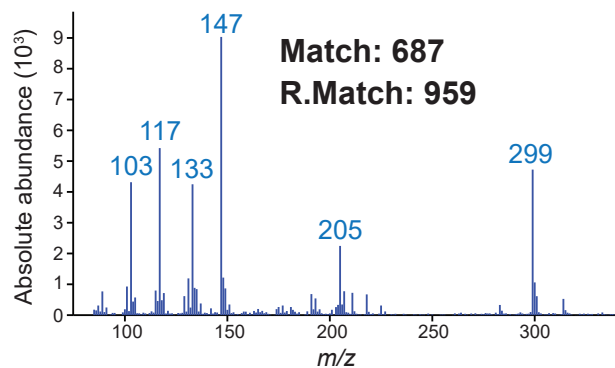

Raw spectrum at 7.279 min

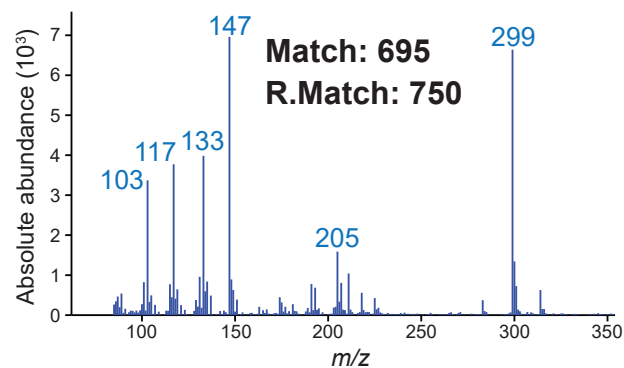

Raw spectrum at 7.295 min

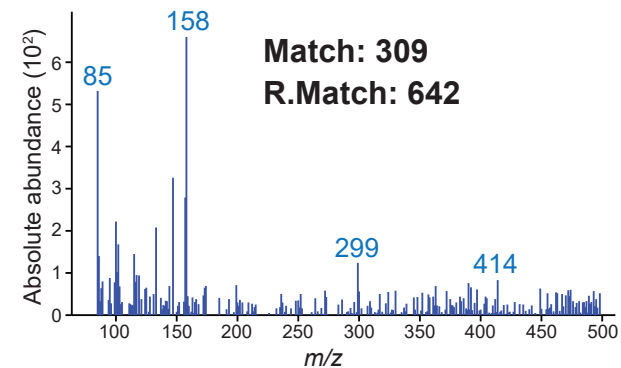

Deconvoluted spectrum at Fiehn RI=344208

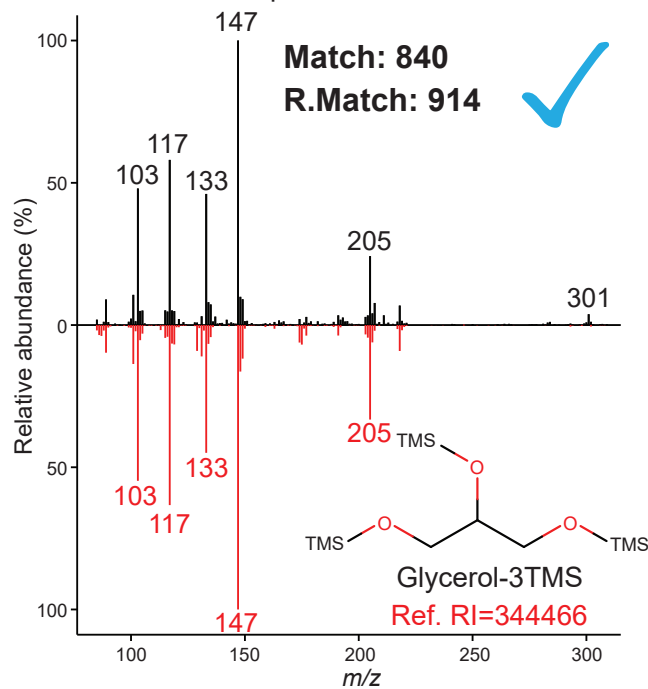

Deconvoluted spectrum at Fiehn RI=344605

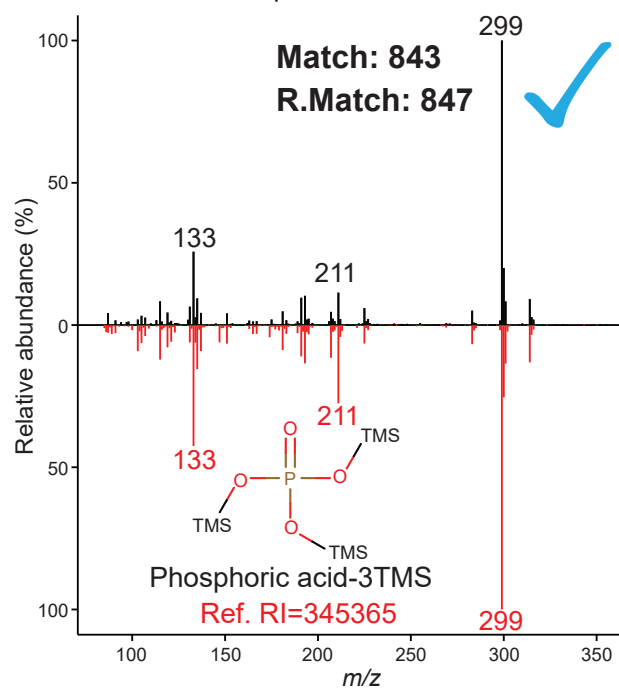

Deconvoluted spectrum at Fiehn RI=345956

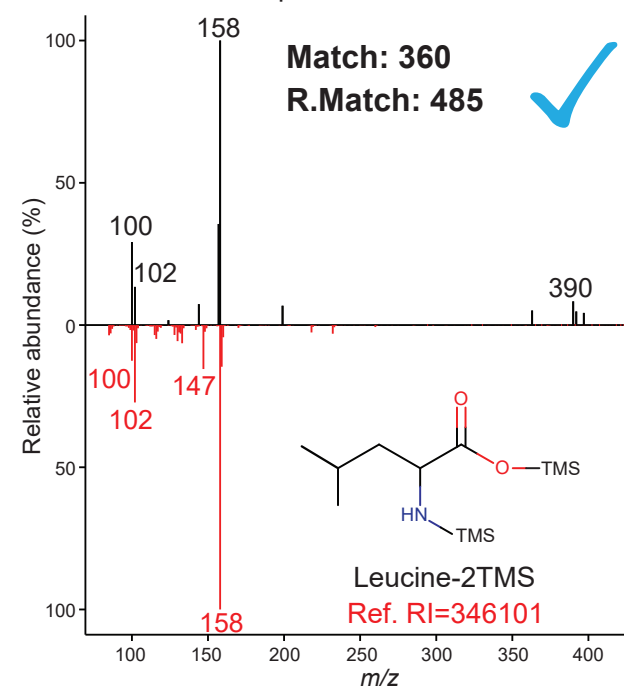

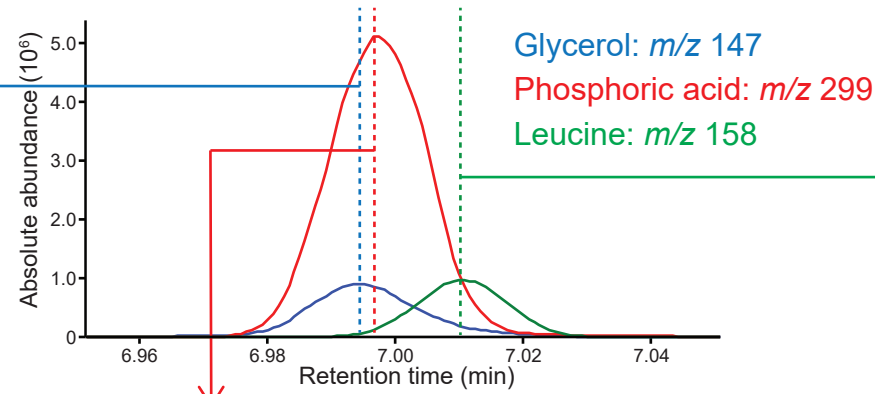

Raw spectrum at 6.994 min

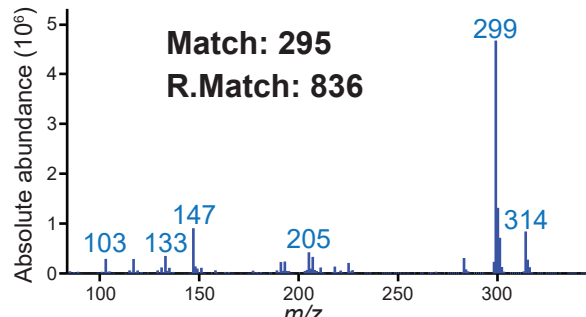

Raw spectrum at 6.997 min

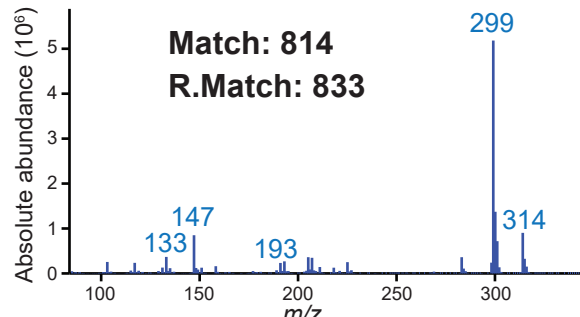

Raw spectrum at 7.001 min

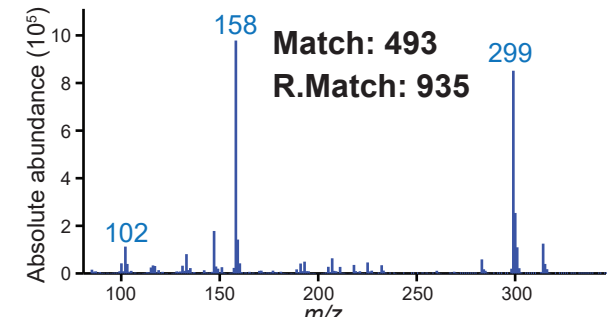

Deconvoluted spectrum

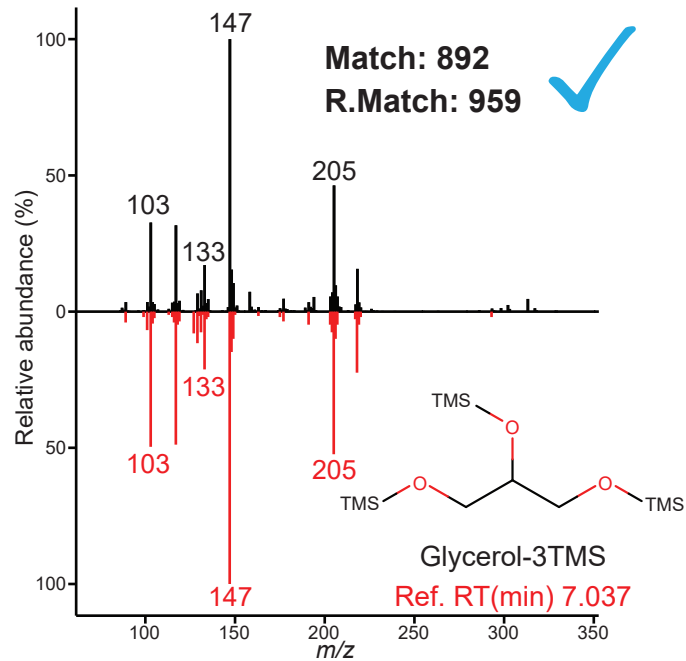

Deconvoluted spectrum

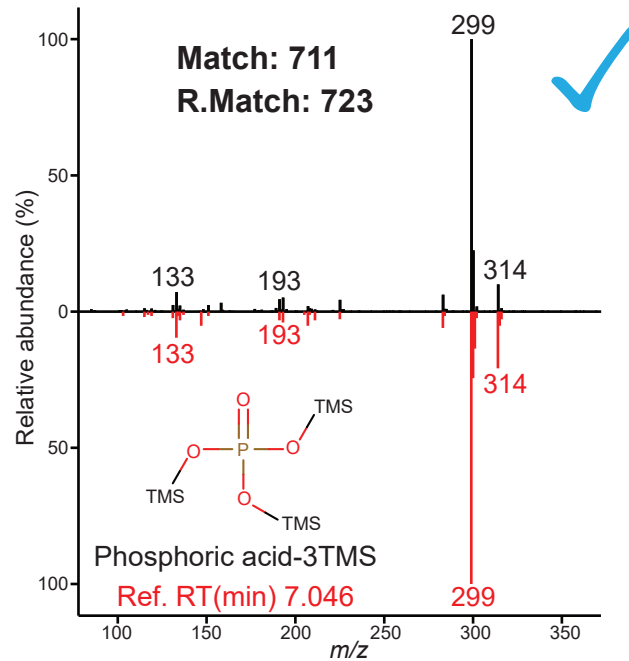

Deconvoluted spectrum

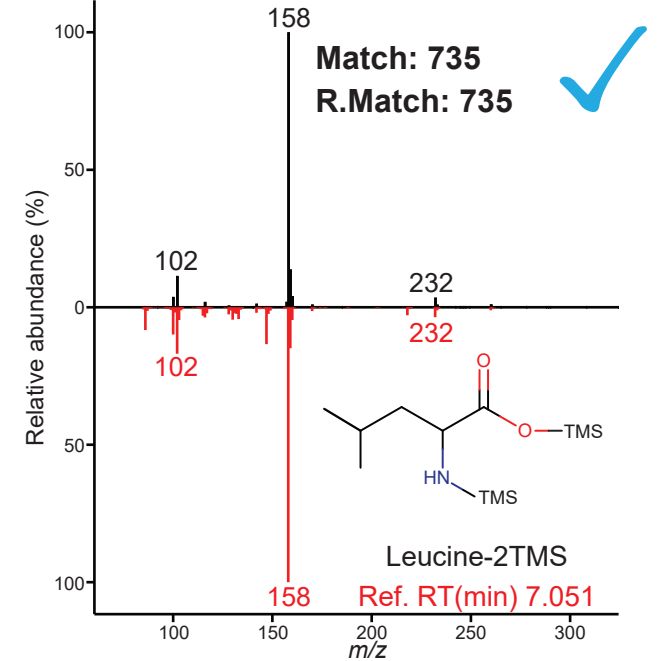

Bruker GC-TOFMS

Pelargonic acid:  $m/z$  117.0075 $\pm$ 0.1

Unknown:  $m/z$  73.0568 $\pm$ 0.1

Pipecolic acid:  $m/z$  156.1184 $\pm$ 0.1

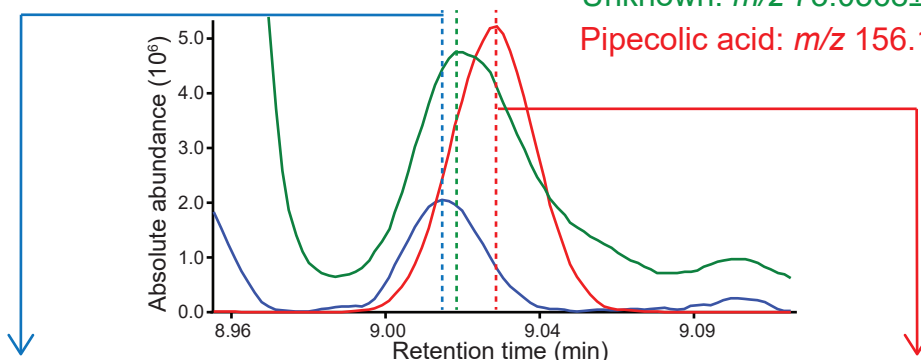

Raw spectrum at 9.014 min

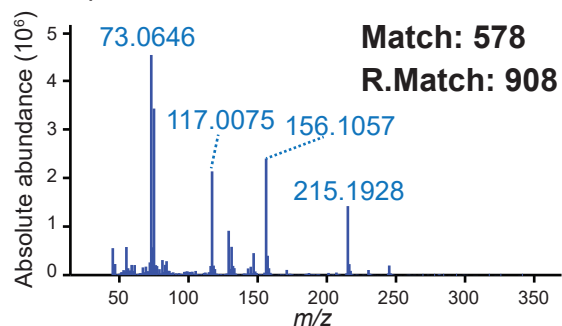

Raw spectrum at 9.029 min

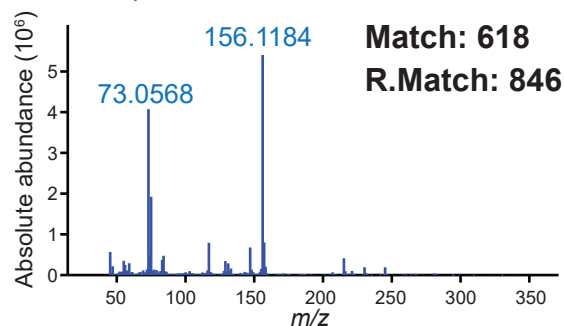

Deconvoluted spectrum at Fiehn RI=400617

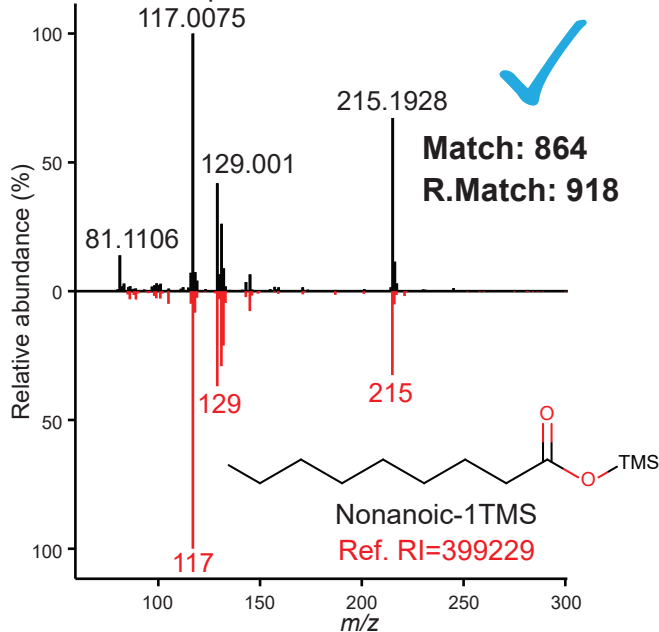

Deconvoluted spectrum at Fiehn RI=401245

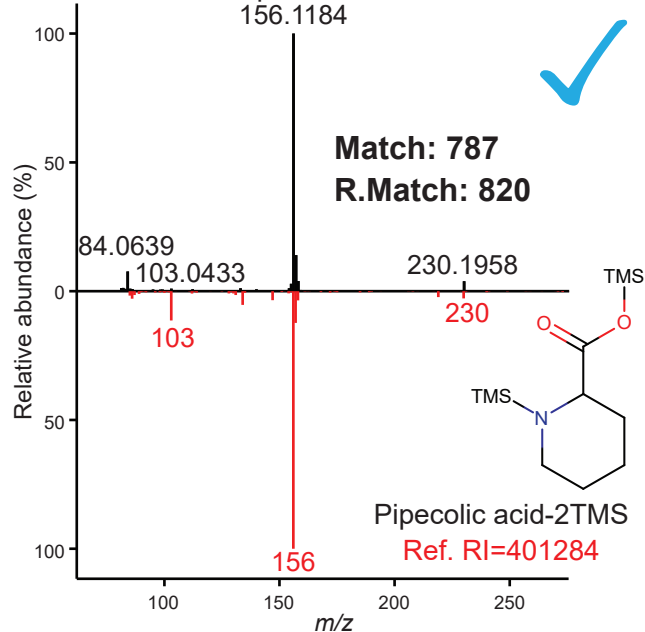

# Thermo GC-QExactive

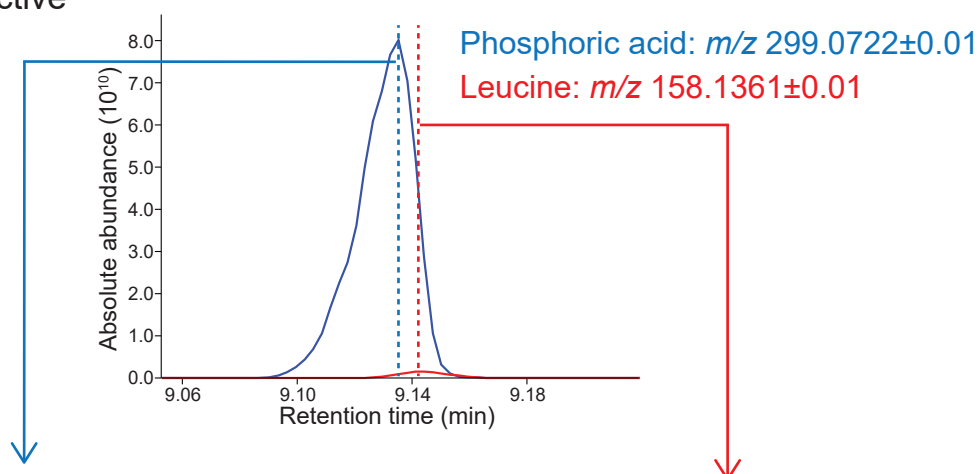

Raw spectrum at 9.135 min

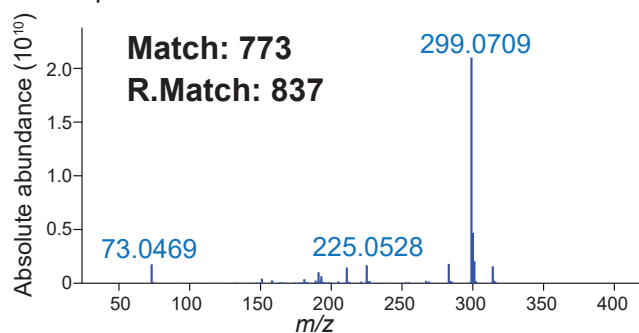

Raw spectrum at 9.144 min

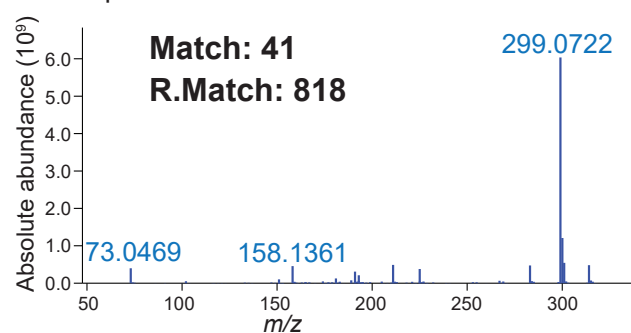

Deconvoluted spectrum

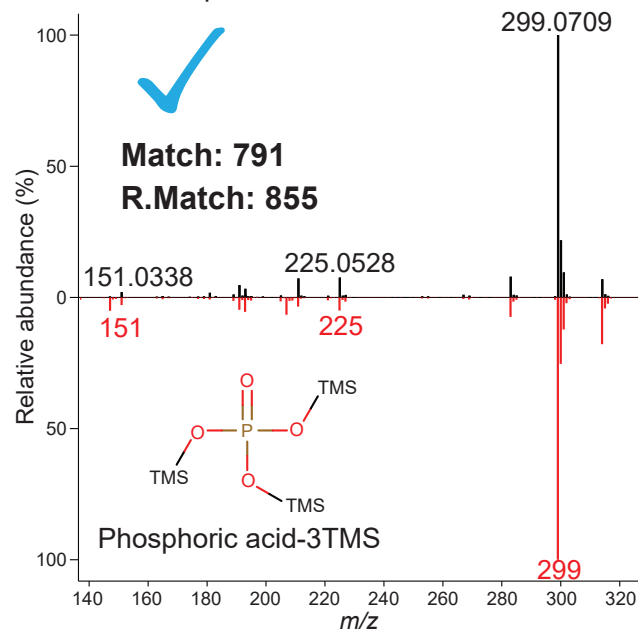

Deconvoluted spectrum

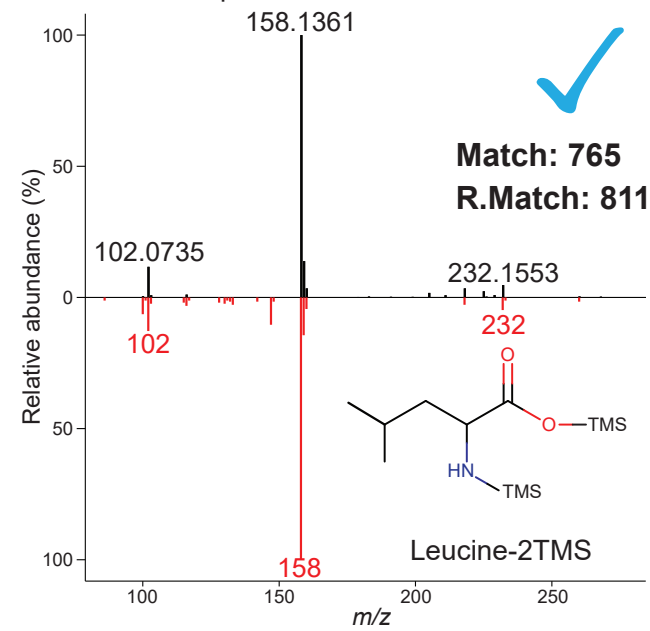

Supplement: 41592_2018_BFnmeth4512_MOESM6_ESM.pdf [file 41592_2018_BFnmeth4512_MOESM6_ESM.pdf]
